# Supplementary material for: Vitamin D Level Trajectories of Adolescent Patients with Anorexia Nervosa at Inpatient Admission, during Treatment, and at One Year Follow Up: Association with Depressive Symptoms
Source: MDPI journal article supplement (doi:10.3390/nu13072356), 2021-07-09
Supplement: s1 [file s1]

Archive with 1 entries (1 files):
- nutrients-1259868-supplementary.pdf
