# Supplementary material for: Vitamin D Level Trajectories of Adolescent Patients with Anorexia Nervosa at Inpatient Admission, during Treatment, and at One Year Follow Up: Association with Depressive Symptoms
Source: MDPI journal article supplement (doi:10.3390/nu13072356), 2021-07-09
Supplement: s1 [file s1 › nutrients-1259868-supplementary.pdf]

**Table S1.** Sample characteristics of non-included (N=93) and included (N=79) patients with AN from the total ANDI study sample at in-/daypatient admission. Values are means  $\pm$  SD or N (%) as indicated.

| Total "ANDI"<br>Sample                    | Non-<br>included | Included     | p-value |
|-------------------------------------------|------------------|--------------|---------|
| N=172                                     | N=79             | N=93         |         |
| Age                                       | 15.1 (1.58)      | 15.3 (1.45)  | 0.2167  |
| Duration of illness (weeks)               | 48.7 (37.6)      | 47.3 (36.3)  | 0.8131  |
| Premorbid BMI (kg/m <sup>2</sup> )        | 19.9 (2.91)      | 20.2 (2.83)  | 0.4515  |
| AN-subtype [N(%)]:                        |                  |              | 0.3470  |
| Binge-Purge                               | 17 (21.8%)*      | 14 (15.1%)*  |         |
| Restrictive                               | 61 (78.2%)*      | 79 (84.9%)*  |         |
| Diagnosis of affective disorder [N (%)]*: |                  |              | 0.4019  |
| no                                        | 41 (61.2%)       | 56 (69.1%)   |         |
| yes                                       | 26 (38.8%)       | 25 (30.9%)   |         |
| BDI-II score                              | 18.8 (10.7)      | 19.8 (10.1)  | 0.5116  |
| BMI kg/m <sup>2</sup>                     | 14.9 (1.40)      | 15.1 (1.28)  | 0.1766  |
| BMI percentile                            | 2.05 (4.84)      | 1.94 (3.18)  | 0.8588  |
| BMI-SDS                                   | -2.79 (1.06)     | -2.67 (0.91) | 0.4007  |
| Vitamin D supplementation [N(%)]:         |                  |              | 0.0728  |
| no                                        | 25 (31.6%)       | 43 (46.2%)   |         |
| yes                                       | 54 (68.4%)       | 50 (53.8%)   |         |

BDI-II = Beck Depression Inventory, AN= anorexia nervosa; \*information available for 78 patients; \* information available for 81 patients, SDS = Standard Deviation Score; ANDI = Anorexia Nervosa Day patient versus Inpatient multicenter trial
